# Supplementary material for: Predicting Endoplasmic Reticulum Resident Proteins Using Auto-Cross Covariance Transformation With a U-Shaped Residue Weight-Transfer Function
Source: Front Genet. 2019 Dec 20;10:1231. doi: 10.3389/fgene.2019.01231 (PMC6932965; doi:10.3389/fgene.2019.01231)
Supplement: Table S2 — Independent testing Dataset-Positive. [file DataSheet_2.xlsx]

## Sheet: Errp_id
Independent Testing Dataset-Positive
Protein ID
PDI15_ARATH
P4H13_ARATH
YGWH_SCHPO
HPRT_SCHPO
MDE5_SCHPO
ALG13_SCHPO
YGV7_SCHPO
EST1_MACFA
YJM5_SCHPO
YQJ7_SCHPO
NUP_SCHPO
UCP10_SCHPO
YBJ7_SCHPO
TORS_DROME
PKSC_ARATH
SPJ1_SCHPO
MNL1_SCHPO
ALG13_CRYNB
GLU2B_USTMA
PDIA4_CAEEL
SLI1_YEAST
LHS1_SCHPO
ITPK2_ORYSJ
PDI1_CAEEL
FCSB_DICDI
ENPL1_CAEEL
PDIA3_CHLAE
ALG13_ASPFU
HS219_ORYSJ
PDI2_DICDI
BIP1_DICDI
ALG13_CANAL
NBAS_DANRE
ALG13_DEBHA
SIL1_DEBHA
ALG13_YARLI
SIL1_KLULA
LHS1_CANGA
SIL1_CANGA
ALG13_CANGA
SELM_XENLA
GT252_MOUSE
SIL1_ASHGO
HS232_ORYSJ
ZYS3_CHLRE
P4H12_ARATH
P4H7_ARATH
CYP23_ARATH
PDI13_ARATH
ERP38_NEUCR
FACR3_ARATH
NPL4_ORYSJ
YKM7_SCHPO
PSL4_ARATH
YHLB_SCHPO
PCS1L_ARATH
MSRB3_ARATH
PDI22_ARATH
ADG1_SCHPO
CEP3_ARATH
P4H11_ARATH
GLU2A_SCHPO
SIL1_DROME
LACS2_ARATH
YGJ3_SCHPO
